# Supplementary material
Source: PubMed Central journal article supplement (PMC3012978)

## Supplemental Procedures and Data (Ruangchan et al., 2010)

*Spectroscopic studies.* Spectrophotometric measurements were carried out with a Hewlett Packard diode-array spectrophotometer (HP 8453A), a Shimadzu (2501PC) or a Cary300Bio double-beam spectrophotometer. All spectrophotometers were equipped with thermostatic cell compartments. Measurements were normally carried out at 25 °C.

### *Enzyme assay for C<sub>2</sub>.*

An assay method used for measuring C<sub>2</sub> activity during the purification process was based on the protocol described in (1) using a coupled assay with 3,4-dihydroxyphenylacetate oxygenase (DHPAO). DHPAO catalyzes the conversion of DHPA to form 5-carboxymethyl-2-hydroxyruinate semialdehyde (CHS), which is a yellow compound with  $\lambda_{\text{max}}$  at 380 nm ( $\epsilon_{380} = 38 \text{ mM}^{-1}\text{cm}^{-1}$  at pH 8.0). A typical assay reaction contained 200  $\mu\text{M}$  HPA, 200  $\mu\text{M}$  NADH,  $\sim 1\text{-}2 \text{ nM}$  C<sub>2</sub>, excess C<sub>1</sub> ( $\sim 0.3 \mu\text{M}$ ), 100  $\mu\text{M}$  (NH<sub>4</sub>)<sub>2</sub>Fe(SO<sub>4</sub>)<sub>2</sub>, and excess DHPAO. At least three different concentrations (1.5, 3 and 5  $\mu\text{M}$ ) of DHPAO were used in order to assure that the rates measured were according to the C<sub>2</sub> reaction. The reactions were carried out in 50 mM sodium phosphate buffer, pH 7.5 at 25 °C. Formation of CHS was monitored at 400 nm ( $\epsilon_{400} = 21.3 \text{ mM}^{-1}\text{cm}^{-1}$ ), and one unit of C<sub>2</sub> activity was defined as the amount of C<sub>2</sub> required to form 1  $\mu\text{mole}$  CHS per minute under the above assay condition.

Another assay method based on the protocol previously described, which was modified to eliminate the use of DHPAO in the coupled assay (59), was also employed for the quick measurement of C<sub>2</sub> in chromatographic fractions. As the NADH oxidation (monitored by absorbance decrease at A<sub>340</sub> nm) catalyzed by C<sub>1</sub> is increased in the presence of C<sub>2</sub>, C<sub>2</sub> activity in each fraction can be measured by monitoring its ability to increase C<sub>1</sub> NADH oxidation (2). A typical assay reaction contained 200  $\mu\text{M}$  NADH, 80  $\mu\text{M}$  HPA and C<sub>1</sub>  $\sim 0.3 \mu\text{M}$  (0.18 unit) in 50 mM sodium phosphate buffer, pH 7.0. This reaction provided a base slope for the C<sub>1</sub> NADH oxidation. When a solution of C<sub>2</sub> was added to the reaction, the slope of the reaction increased. The magnitude of the slope change can be used to represent the concentration of C<sub>2</sub> in the assay reaction.

*Rapid Kinetics Measurements.* All reactions were performed with a Hi-Tech Scientific Model SF-61DX stopped-flow spectrophotometer in single-mixing mode at 4 °C. Details for rapid kinetics measurements are described in Supplemental Materials. The optical path-length of the observation cell was 1 cm. The stopped-flow apparatus was made anaerobic by flushing the flow system with an oxygen scrubbing solution containing 400  $\mu\text{M}$  glucose, 1 mg/ml glucose oxidase (15.5 unit/ml), and 4.8  $\mu\text{g/ml}$  catalase in 50 mM sodium phosphate buffer, pH 7.0. The oxygen scrubbing solution was allowed to stand in the flow system overnight and was thoroughly rinsed with an anaerobic buffer prior to performing experiments (3). The methods used for studying the reactions of C<sub>2</sub> with oxygen were similar to the protocols used in the previous report (4) except that dithiothreitol (DTT) was removed from the enzyme solution prior to the experiments. Solutions of C<sub>2</sub> plus oxidized FMN in the presence or absence of HPA were made anaerobic in glass tonometers by several cycles of evacuation and equilibration with nitrogen gas (ultra high purity grade). The solutions were then stoichiometrically reduced with a solution of sodium dithionite ( $\sim 5 \text{ mg/ml}$  in 100 mM potassium phosphate buffer, pH 7.0) delivered from a syringe attached to the tonometer. Buffers used for maintaining various pH values were 100 mM sodium phosphate buffer (pH 6.0-7.5), 100 mM Tris-HCl buffer (pH 8.0-8.5) and 100 mM glycine adjusted with NaOH (pH 9.0-10.0). Stopped-flow experiments were monitored for absorbance changes at 380 nm and 446 nm. For product analysis, about 4 shots from the stopped-flow mixing at each pH were collected after the reaction was complete. HCl was added to the collected sample to a final concentration of 0.08 M, and then passed through an ultrafiltration unit (Microcon) with a molecular weight cut-off of 10 kDa to collect the filtrate. The quantity of 3,4-dihydroxyphenylacetate (DHPA) in each sample was determined using the HPLC analysis as described previously (1,5).

*Determination of hydrogen peroxide from single turnover reactions of C<sub>2</sub> using peroxidase coupled assay.* To investigate whether the C<sub>2</sub> reaction forms H<sub>2</sub>O<sub>2</sub> as a byproduct from the uncoupling pathway, measurements of H<sub>2</sub>O<sub>2</sub> were carried out using a horseradish peroxidase assay with ABTS as a substrate (6) or an oxygen-electrode to measure the amount of O<sub>2</sub> derived from H<sub>2</sub>O<sub>2</sub> (described in the main text). Solutions of C<sub>2</sub> (100 μM), FMNH<sup>-</sup> (50 μM), and HPA (2 mM) in 10 mM sodium phosphate buffer pH 7.0 were mixed with air-saturated buffers containing 2 mM HPA at 25 °C and at various pH. The mixings were carried out in closed vessels inside the anaerobic glovebox. Buffers used for maintaining various pH were 100 mM sodium phosphate buffer (pH 6.0 and 7.0), 100 mM Tris-HCl buffer (pH 8.0), and 100 mM Glycine buffer adjusted with NaOH (pH 9.0 and 10.0). All concentrations represent those after mixing conditions. After the reaction completed, the mixture was quenched immediately with HCl (0.15 M). Protein was then removed from the quenched solution using a Centricon YM-10 concentrator. The samples were analyzed for H<sub>2</sub>O<sub>2</sub> by measuring final absorbance increases at 420 nm ( $\epsilon_{420} = 42.3 \text{ mM}^{-1}\text{cm}^{-1}$ ), which result from the oxidation of ABTS by H<sub>2</sub>O<sub>2</sub> catalyzed by horseradish peroxidase. A typical assay (total volume = 1 mL) contained 50 μL of a sample from the C<sub>2</sub> reaction, 0.5 mM ABTS, and 0.2 unit horseradish peroxidase in 100 mM sodium phosphate buffer pH 7.0 at 25 °C. A standard curve of the H<sub>2</sub>O<sub>2</sub> concentration versus the absorbance change was constructed for estimating unknown H<sub>2</sub>O<sub>2</sub> concentration. The lower limit of detection based on this method was 0.5 μM H<sub>2</sub>O<sub>2</sub> which is equivalent to 1% of H<sub>2</sub>O<sub>2</sub> that would be generated from the uncoupling pathway.

### FIGURE LEGENDS

FIGURE 1. Kinetics of the reaction of C<sub>2</sub>:FMNH<sup>-</sup> with oxygen. A solution of the reduced enzyme (C<sub>2</sub>:FMNH<sup>-</sup>) was mixed with 50 mM sodium phosphate buffers with various oxygen concentrations in the stopped-flow spectrophotometer. The final reactions contained C<sub>2</sub> (35 μM), FMNH<sup>-</sup> (16 μM), and oxygen (0.13, 0.31, 0.61, and 1.03 mM, from the lower to the upper traces at 380 nm). The reactions were monitored for absorbance changes at 380 and 446 nm.

FIGURE 2. Rate constants for formation of C<sub>2</sub>:C4a-hydroperoxy:HPA at pH 6.2 and 8.4. A solution of the reduced enzyme (C<sub>2</sub>:FMNH<sup>-</sup>:HPA) was mixed with buffers containing oxygen plus HPA in the stopped-flow spectrophotometer (The same experiment as in Fig. 4 of the main manuscript). The reactions were monitored for absorbance changes at 380 and 446 nm. After mixing, the reaction contained C<sub>2</sub> (35 μM), FMNH<sup>-</sup> (16 μM), HPA (2 mM) and oxygen (0.13, 0.31, 0.61, and 1.03 mM). The plot shows  $k_{obs}$  of the second phase (see the main text) versus the oxygen concentrations at pH 6.2 (empty circles) and 8.4 (filled circles), consistent with a bimolecular rate constant of  $\sim 4.8 \times 10^4 \text{ M}^{-1}\text{s}^{-1}$ .

FIGURE 3. Analysis of the reaction data of the C<sub>2</sub>:FMNH<sup>-</sup>:HPA complex with oxygen at various pH. A plot shows the observed rate constants from the third phase (FMN oxidation) of A380 traces versus pH.

### REFERENCES

1. Chaiyen, P., Suadee, C., and Wilairat, P. (2001) *Eur. J. Biochem.* **268**, 5550-5561
2. Sucharitakul, J., Phongsak, T., Entsch, B., Svasti, J., Chaiyen, P., and Ballou, D. P. (2007) *Biochemistry* **46**, 8611-8623
3. Sucharitakul, J., Chaiyen, P., Entsch, B., and Ballou, D. P. (2005) *Biochemistry* **44**, 10434-10442
4. Sucharitakul, J., Chaiyen, P., Entsch, B., and Ballou, D. P. (2006) *J. Biol. Chem.* **281**, 17044-17053
5. Thotsaporn, K., Sucharitakul, J., Wongratana, J., Suadee, C., and Chaiyen, P. (2004) *Biochim. Biophys. Acta.* **1680**, 60-66
6. Danneel, H.J., Rössner, E., Zeeck, A., and Giffhorn, F. (1993) *Eur. J. Biochem.* **214**, 795-802

FIGURE 1.

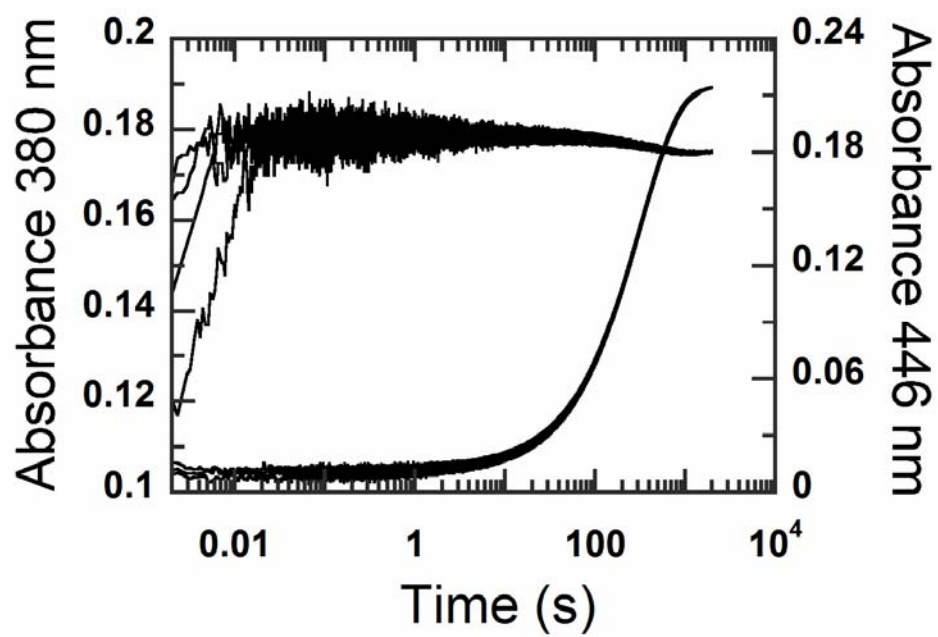

FIGURE 2.

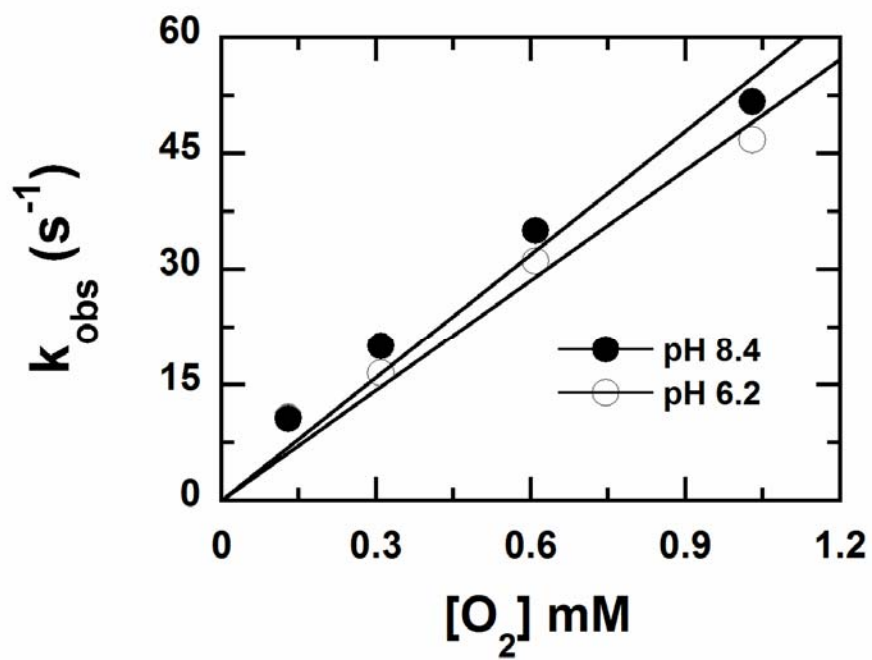

FIGURE 3.

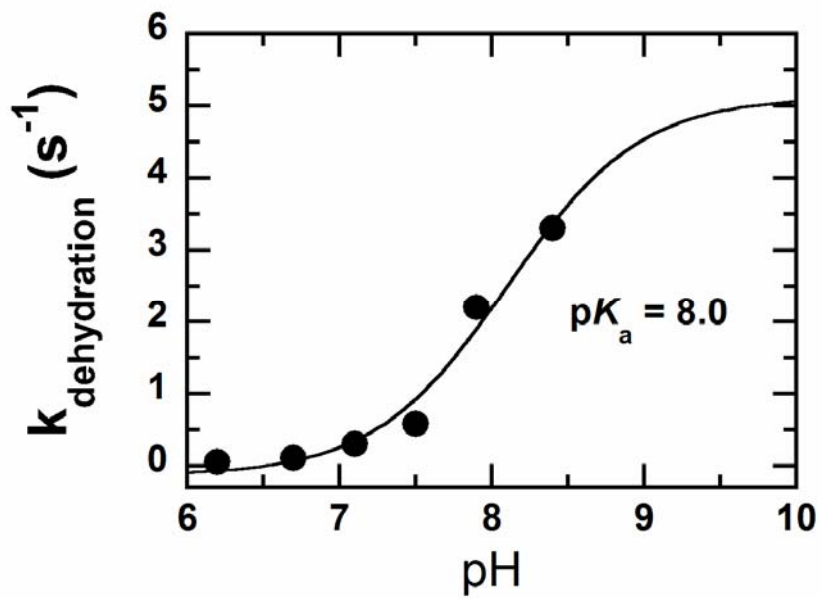

Supplement: supp_M110.163881_jbc.M110.163881-1.pdf [file supp_M110.163881_jbc.M110.163881-1.pdf]
